# Supplementary material for: Selective catalytic NOx reduction by H2 in excess O2 over Pt/zirconium phosphate nanosheets
Source: Royal Society of Chemistry journal article supplement (doi:10.1039/d4cy00879k), 2024-01-01
Supplement: d4cy00879k1.pdf [file d4cy00879k1.pdf]

## ***Supplementary Information***

# Selective Catalytic NO<sub>x</sub> Reduction by H<sub>2</sub> in Excess O<sub>2</sub> over Pt/Zirconium Phosphate Nanosheet.

Keisuke Awaya,<sup>\*a</sup> Yuka Sato,<sup>b</sup> Aoi Miyazaki,<sup>b</sup> Mana Furukubo,<sup>b</sup> Koshi Nishiyama,<sup>b</sup> Masayuki Tsushida,<sup>c</sup> Shintaro Ida,<sup>d</sup> Junya Ohshima,<sup>a,d</sup> Masato Machida<sup>\*a,d</sup>

a) Faculty of Advanced Science and Technology, Kumamoto University; 2-39-1, Kurokami, Chuo-ku, Kumamoto, 860-8555, Japan.

b) Graduate School of Science and Technology, Kumamoto University; 2-39-1, Kurokami, Chuo-ku, Kumamoto, 860-8555, Japan.

c) Technical Division, Kumamoto University; 2-39-1, Kurokami, Chuo-ku, Kumamoto, 860-8555, Japan.

d) Institute of Industrial Nanomaterials (IINa), Kumamoto University; 2-39-1, Kurokami, Chuo-ku, Kumamoto, 860-8555, Japan.

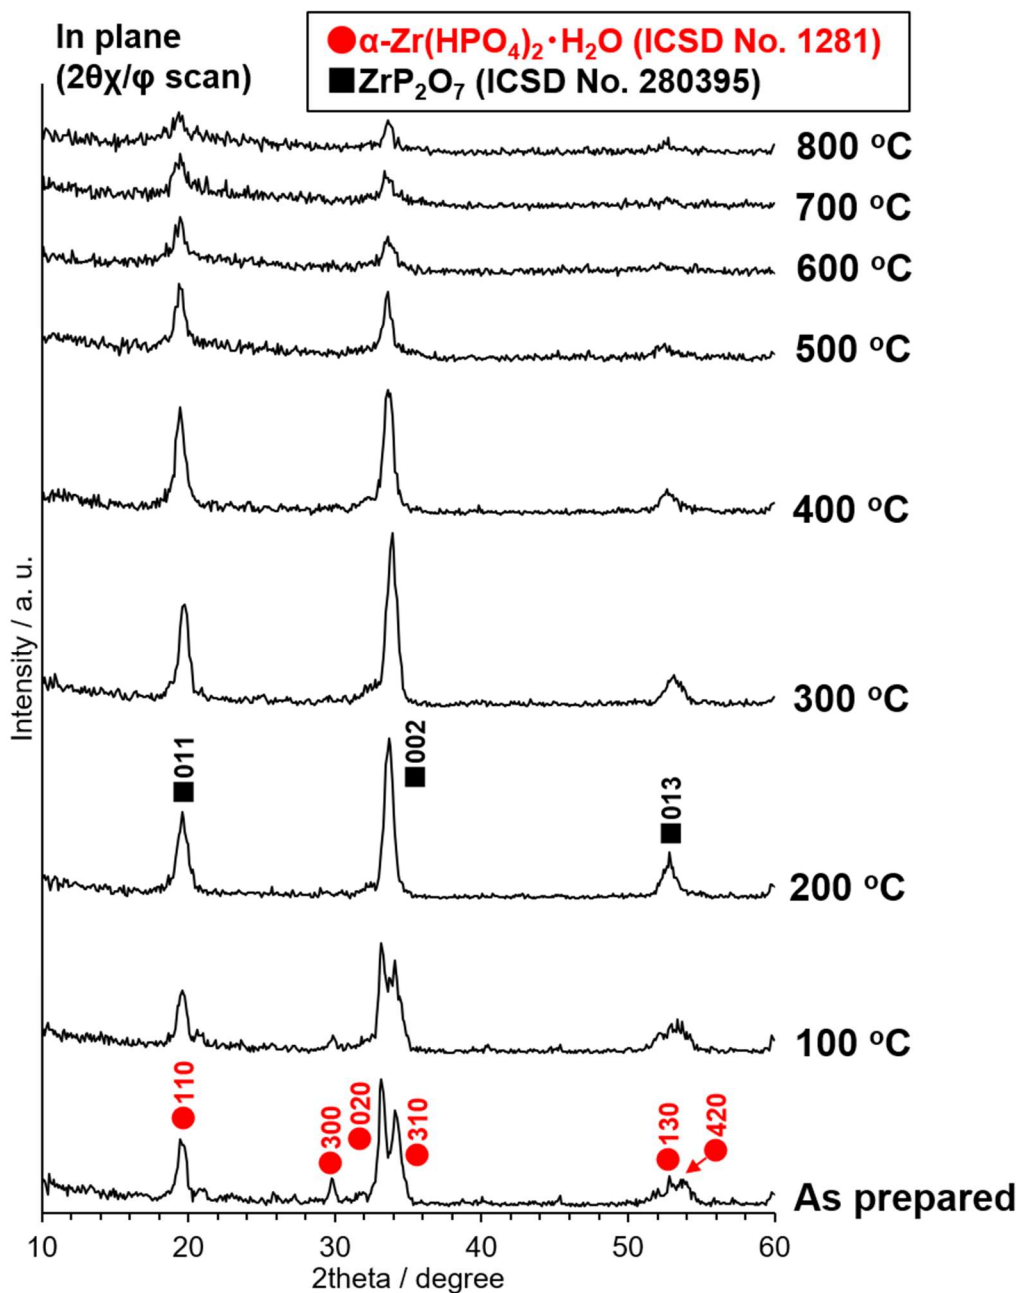

**Figure S1.** In-plane XRD patterns ( $2\theta/\varphi$  scan) of the ZrP nanosheet spin-coating film deposited on a Si wafer before and after annealing at 100-800 °C for 1 h.

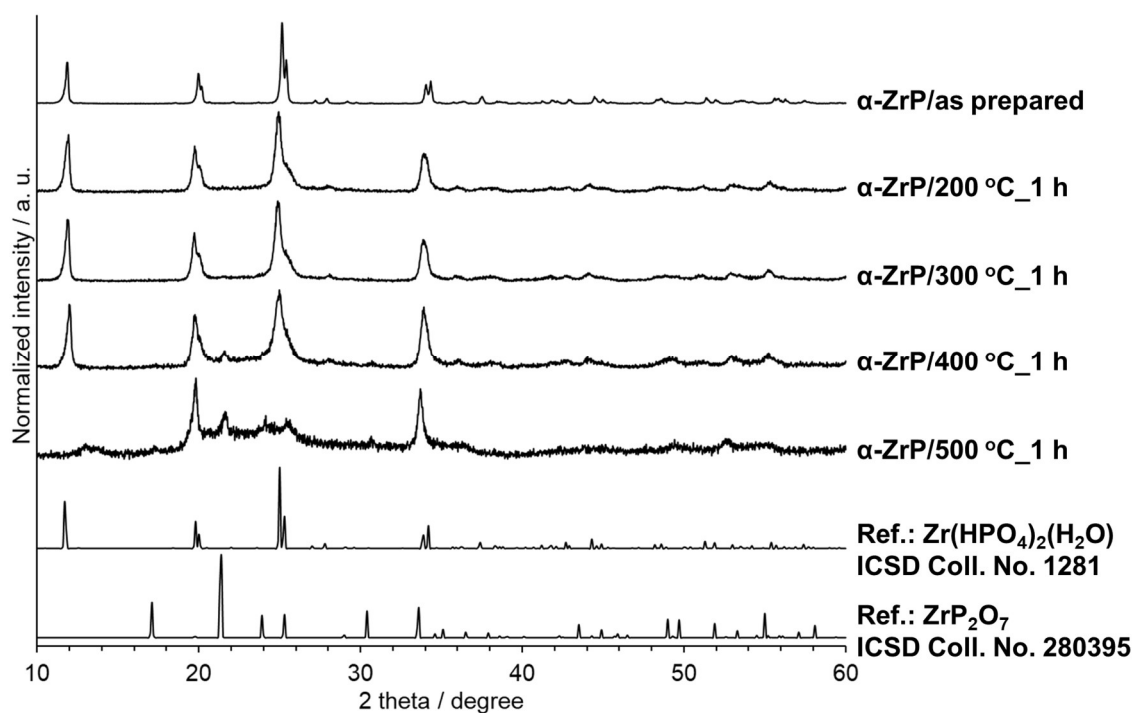

**Figure S2.** Powder XRD patterns ( $2\theta/\theta$  scan) of the  $\alpha$ -ZrP ( $\alpha$ -Zr(HPO<sub>4</sub>)<sub>2</sub>·H<sub>2</sub>O) before and after annealing at 200-500 °C for 1 h, ICSD #1281 ( $\alpha$ -Zr(HPO<sub>4</sub>)<sub>2</sub>·H<sub>2</sub>O), and ICSD #280395 (ZrP<sub>2</sub>O<sub>7</sub>).

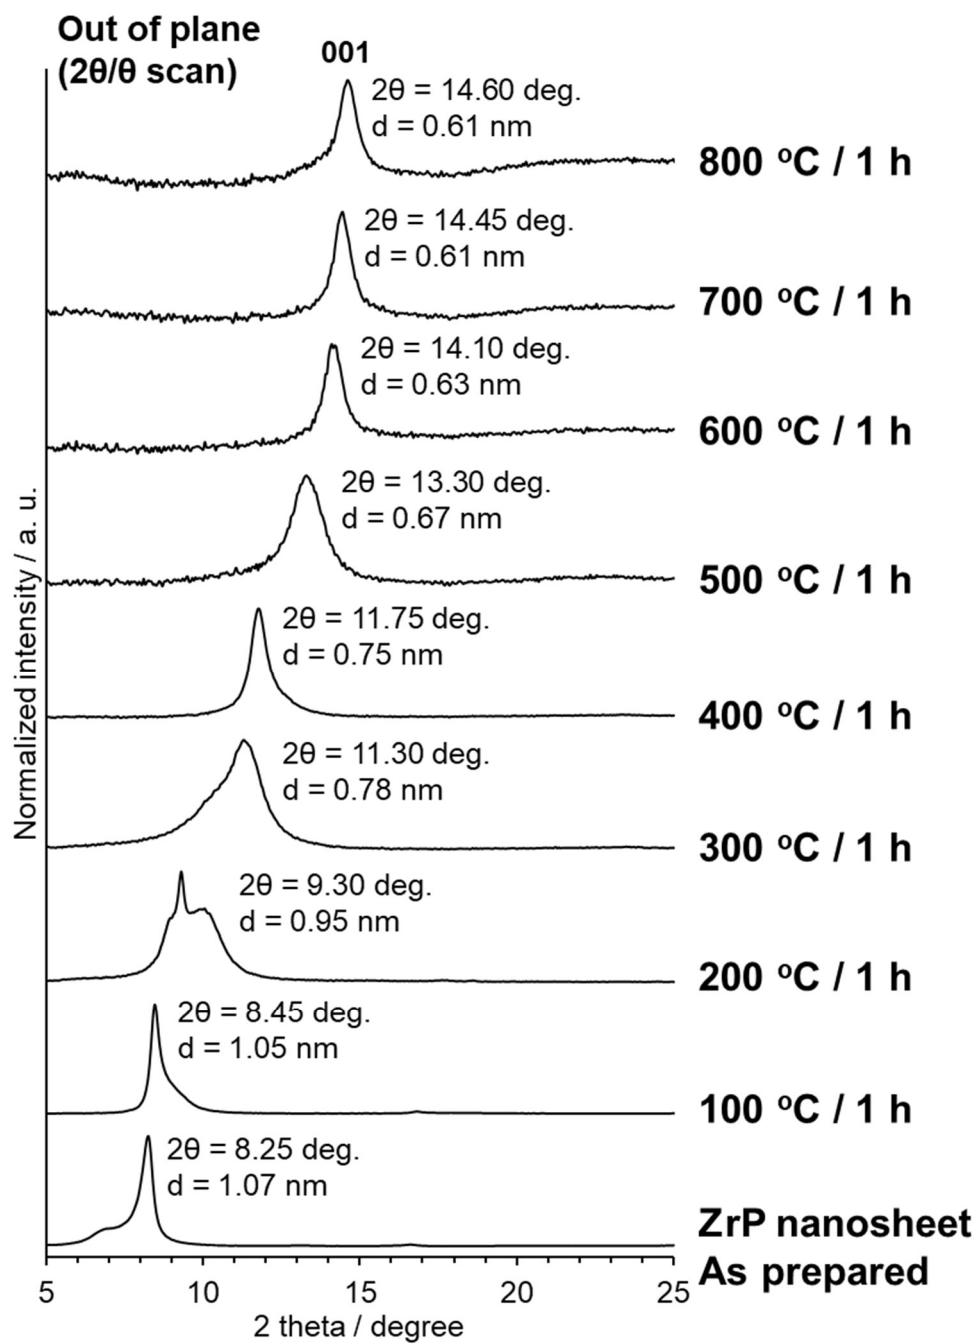

**Figure S3.** Out-of-plane XRD patterns (2 $\theta$ / $\theta$  scan) of the ZrP nanosheet spin-coating film deposited on a Si wafer before and after annealing at 100-800 °C for 1 h.

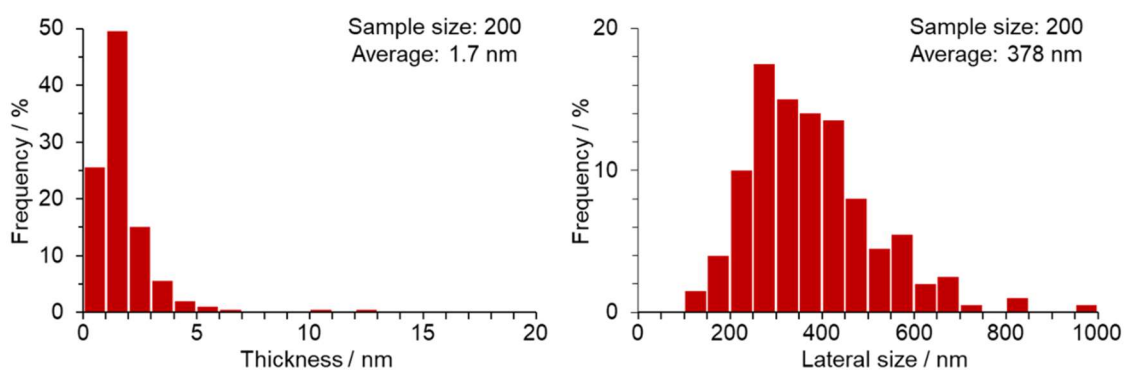

**Figure S4.** Thickness and lateral size distributions of the ZrP nanosheet deposited on a Si wafer (analysis of AFM images).

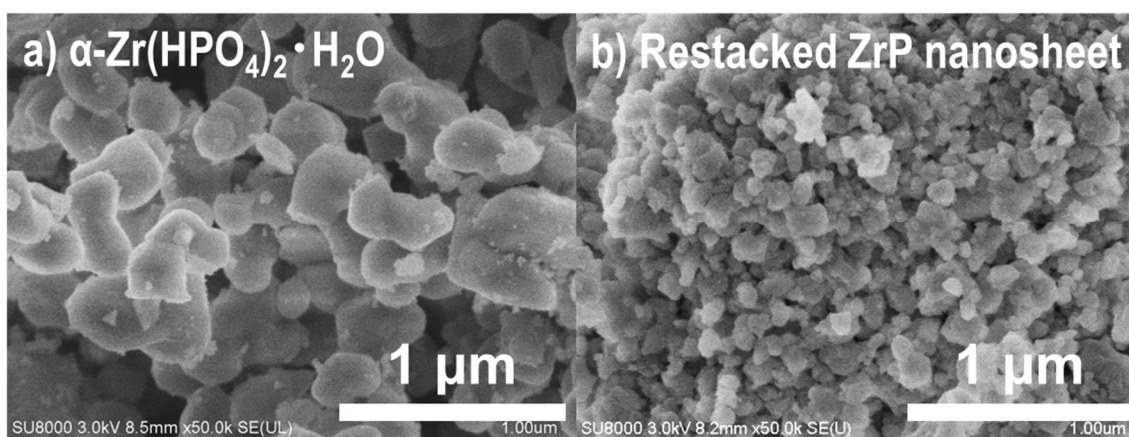

**Figure S5.** FE-SEM images of the (a)  $\alpha$ -ZrP ( $\alpha$ -Zr( $\text{HPO}_4$ ) $_2 \cdot \text{H}_2\text{O}$ ) and (b) restacked ZrP nanosheet.

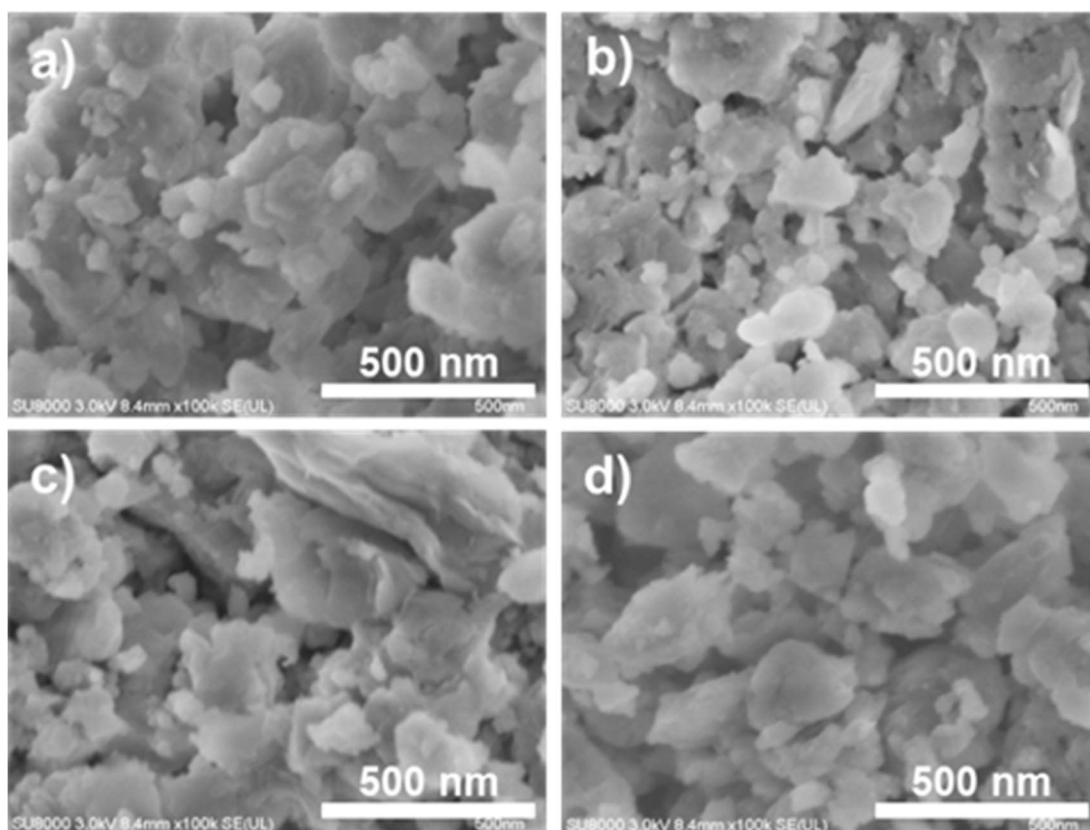

**Figure S6.** FE-SEM images of (a) 0.08, (b) 0.14, (c) 0.22, and (d) 0.49 wt% Pt (ads.)/ZrP nanosheet.

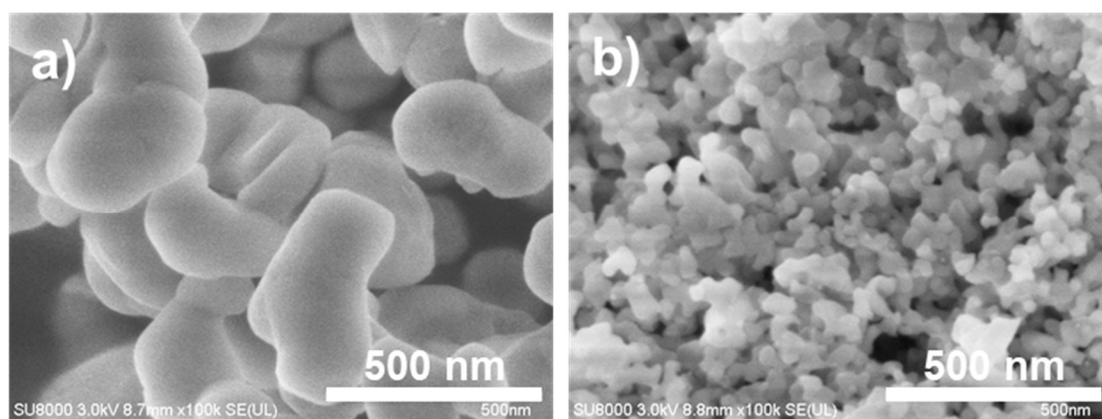

**Figure S7.** FE-SEM images of the (a) 0.5 wt% Pt (ads.)/ $\alpha$ -Zr(HPO<sub>4</sub>)<sub>2</sub>·H<sub>2</sub>O and (b) 0.4 wt% Pt (ads.)/ZrP<sub>2</sub>O<sub>7</sub>.

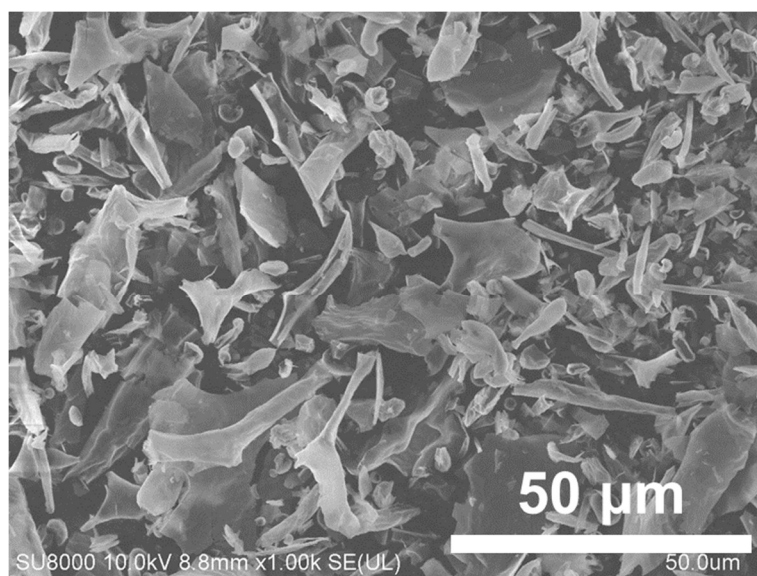

**Figure S8.** FE-SEM image of the freeze-dried ZrP nanosheet.

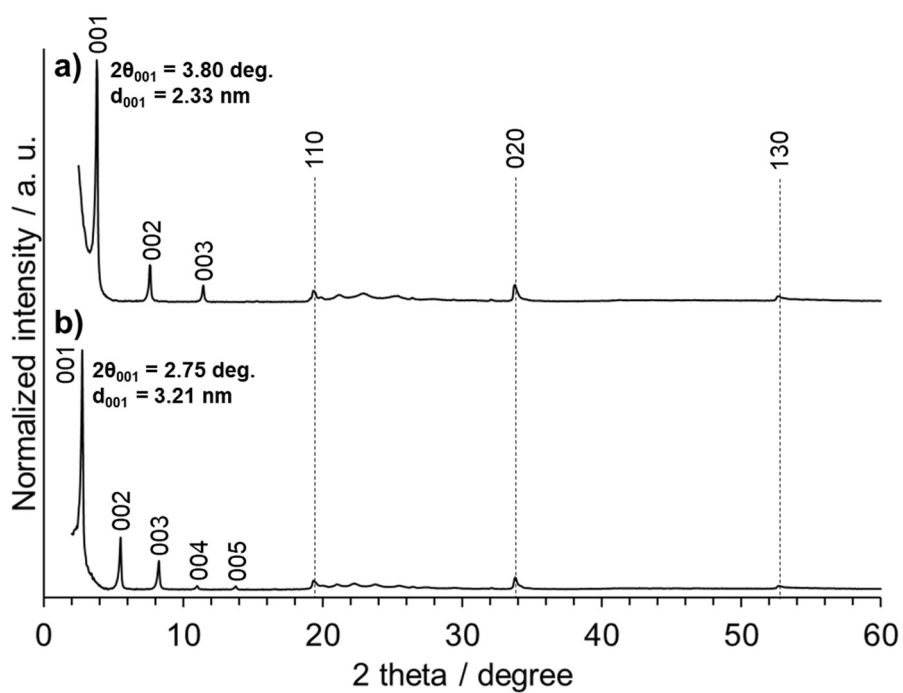

**Figure S9.** Powder XRD patterns ( $2\theta/\theta$  scan) of the (a) hexylamine (HA)- and the (b) decylamine (DA)-restacked ZrP nanosheet.

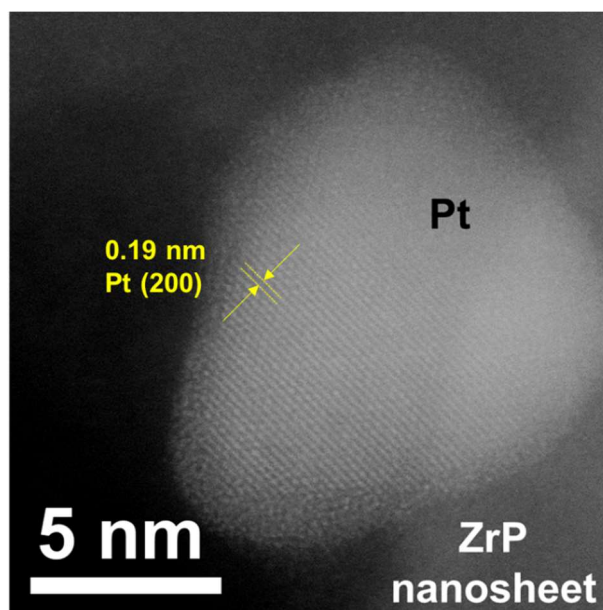

**Figure S10.** A HAADF-STEM image of the Pt (particle size  $\sim 14$  nm) particle on ZrP nanosheet (0.49 wt% Pt (ads.)/ZrP nanosheet).

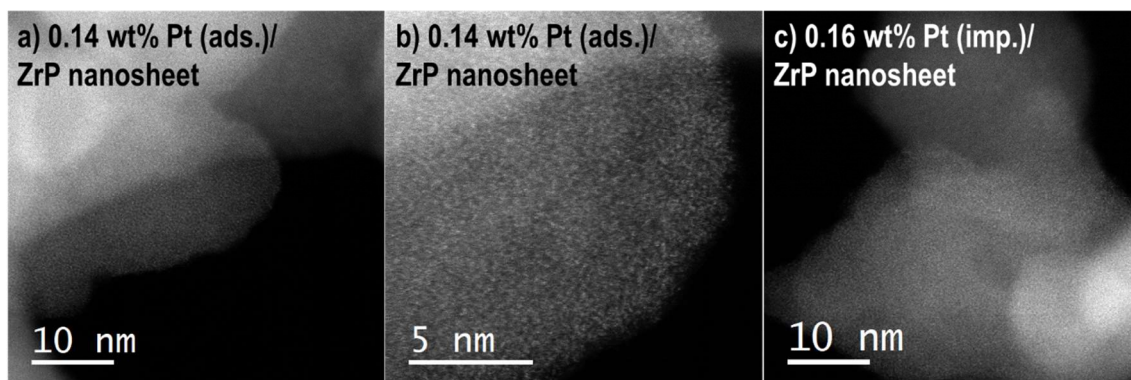

**Figure S11.** HAADF-STEM images of the (a-b) 0.14 wt% Pt (ads.)/ZrP nanosheet and (c) 0.16 wt% Pt (imp.)/ZrP nanosheet.



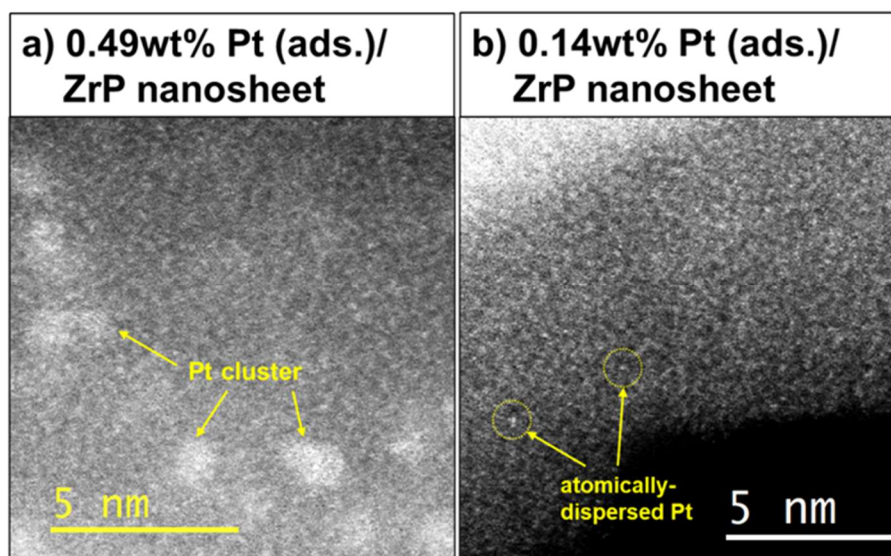

**Figure S12.** HAADF-STEM images showing Pt clusters and atomically-dispersed Pt on (a) 0.49 wt% Pt (ads.)/ZrP nanosheet and (b) 0.14 wt% Pt (ads.)/ZrP nanosheet.

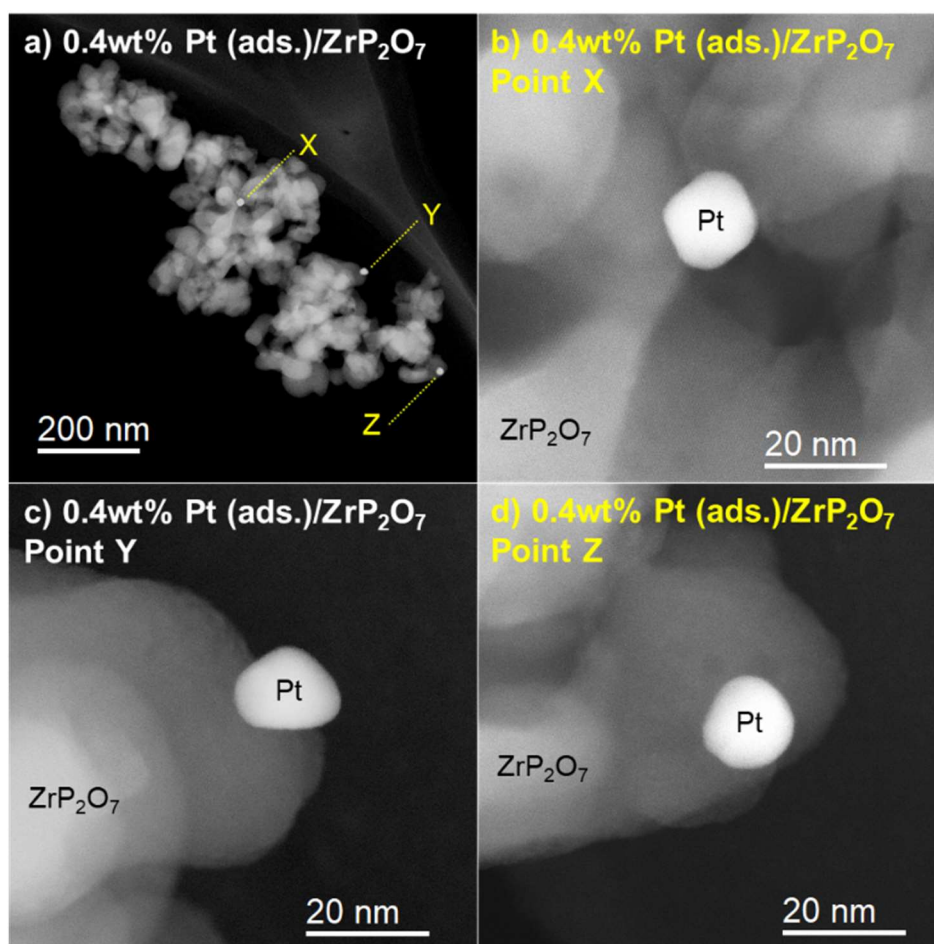

**Figure S13.** (a-d) HAADF-STEM images of 0.4 wt% Pt (ads.)/ZrP<sub>2</sub>O<sub>7</sub>. The images (b), (c), and (d) are zoomed images of the area marked by X, Y, and Z in (a).

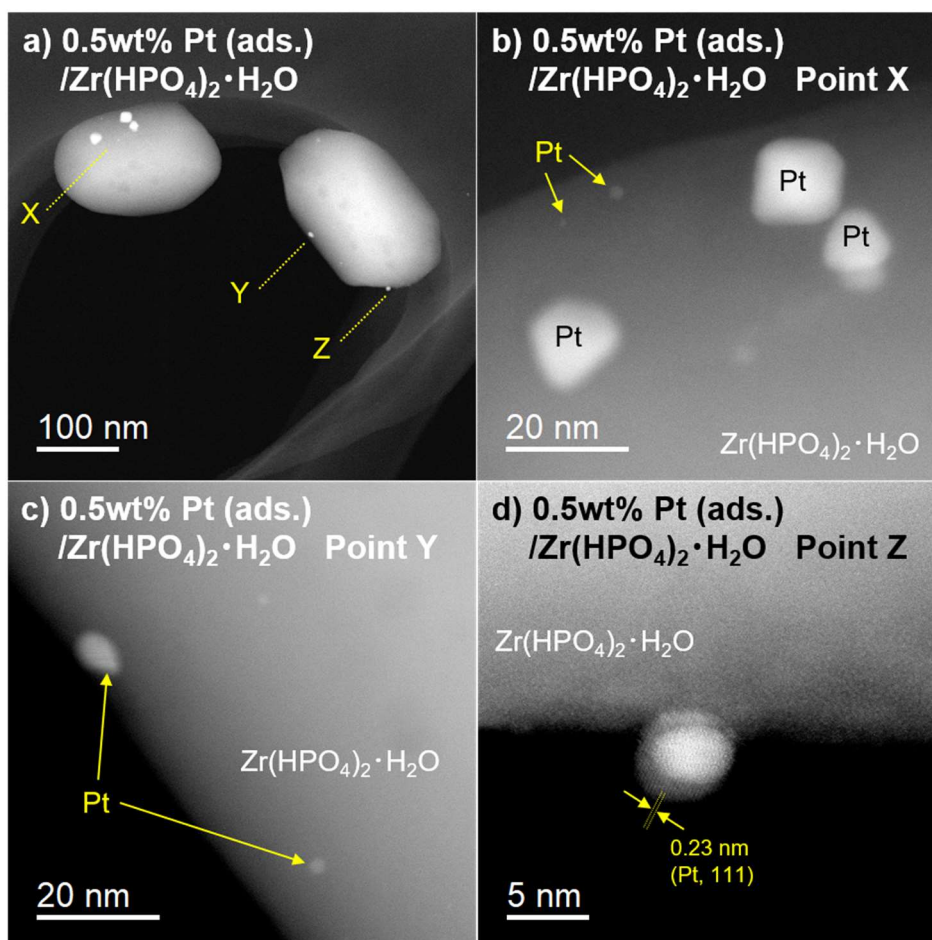

**Figure S14.** (a-d) HAADF-STEM images of 0.5 wt% Pt (ads.)/ $\alpha$ -Zr(HPO<sub>4</sub>)<sub>2</sub>·H<sub>2</sub>O. The images (b), (c), and (d) are zoomed images of the area marked by X, Y, and Z in (a).

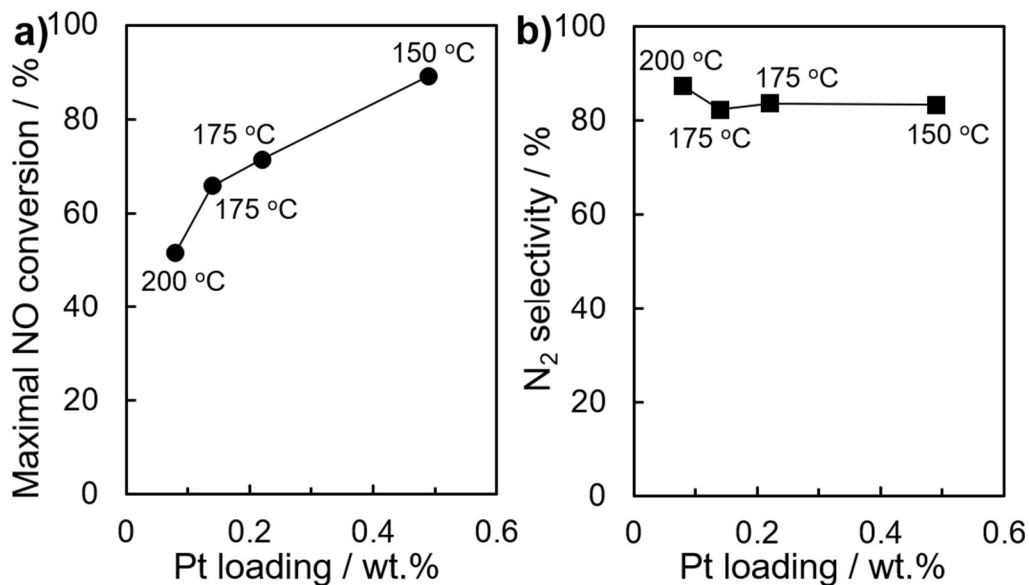

**Figure S15.** (a) Maximal NO conversion for H<sub>2</sub>-SCR over 0.08 (200 °C), 0.14 (175 °C), 0.22 (175 °C), and 0.49 wt% (150 °C) Pt (ads.)/ZrP nanosheet. (b) N<sub>2</sub> selectivity over 0.08-0.49 wt% Pt (ads.)/ZrP nanosheet at the same temperatures for (a).

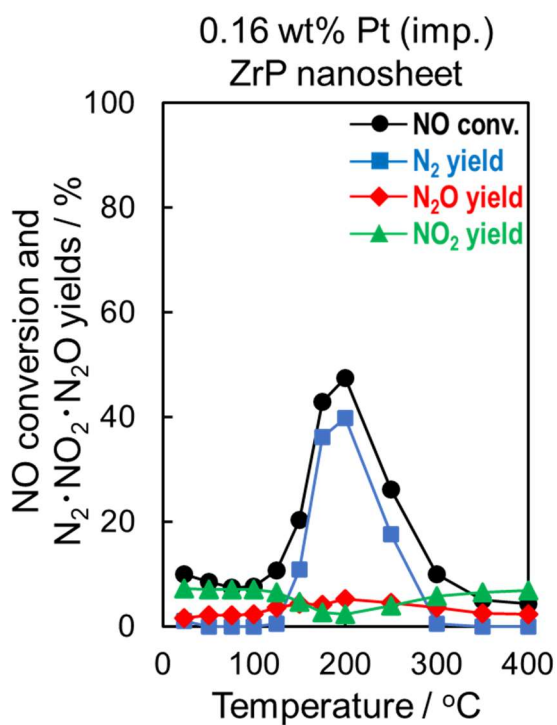

**Figure S16.** Temperature dependence of NO conversion and product yields over 0.16 wt% Pt (imp.)/ZrP nanosheet. NO (200 ppm), H<sub>2</sub> (5,000 ppm), O<sub>2</sub> (10%), and He balance.

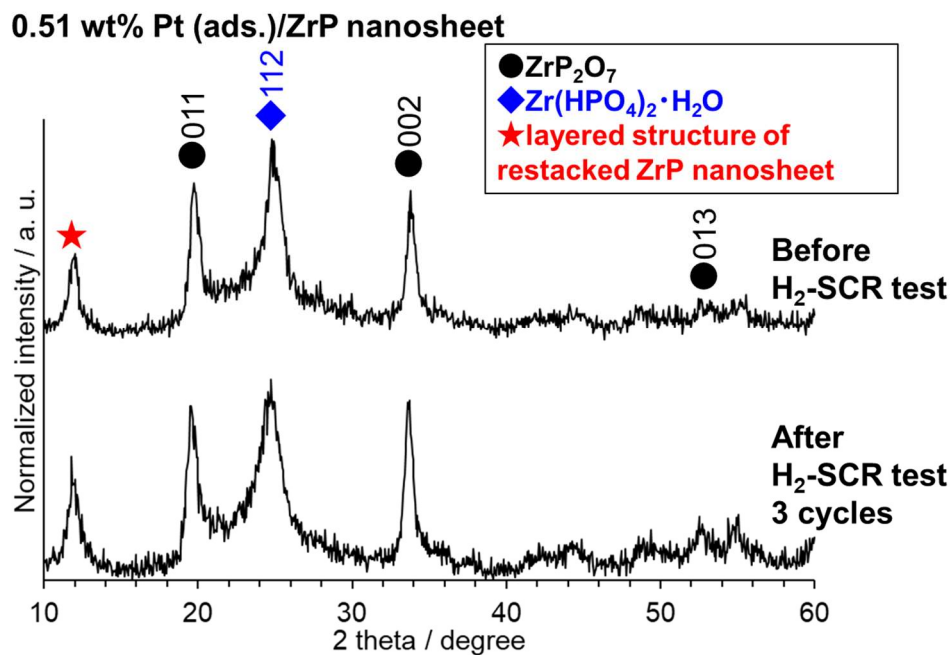

**Figure S17.** Powder XRD patterns ( $2\theta/\theta$  scan) of the 0.51 wt% Pt (ads.)/ZrP nanosheet before and after examining 3 cycles of  $\text{H}_2$ -SCR performance test.

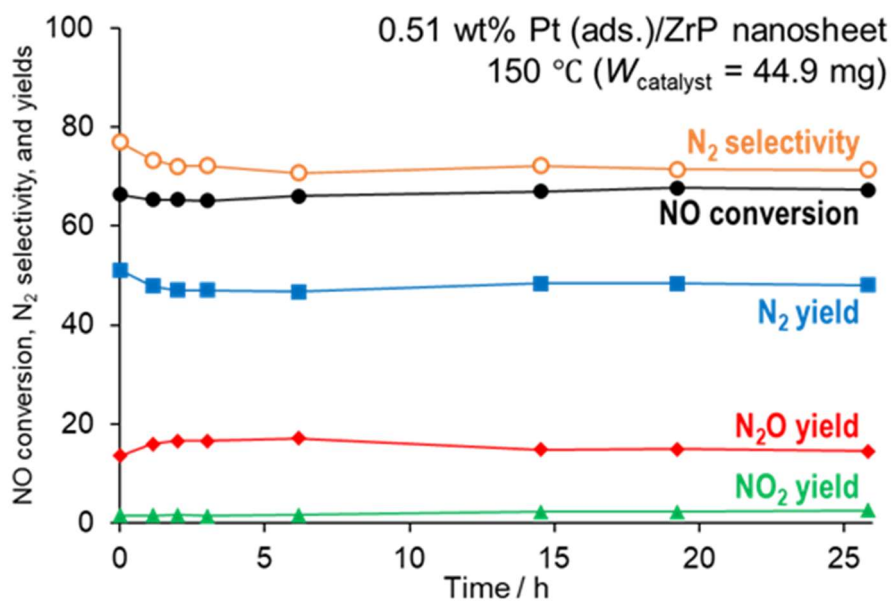

**Figure S18.** Continuous  $\text{H}_2$ -SCR performance test over 0.51 wt% Pt (ads.)/ZrP nanosheet at 150 °C in NO (200 ppm),  $\text{H}_2$  (5,000 ppm),  $\text{O}_2$  (10%), and He balance ( $W_{\text{catalyst}} = 44.9$  mg).

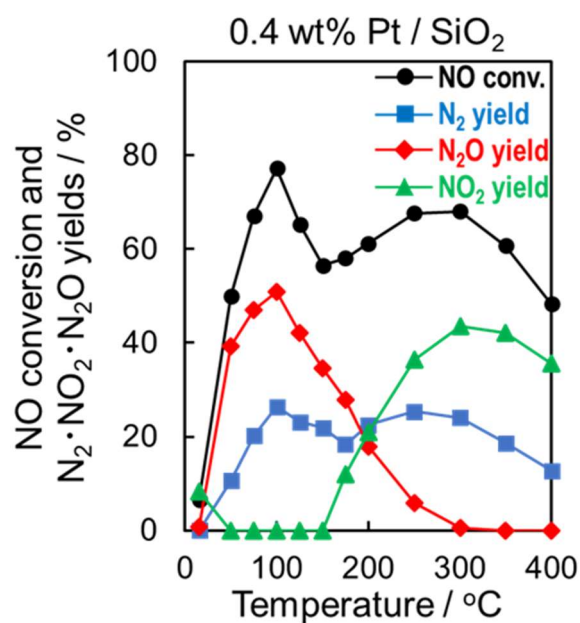

**Figure S19.** Temperature dependence of NO conversion and product yields over 0.4 wt% Pt/SiO<sub>2</sub>. NO (200 ppm), H<sub>2</sub> (5,000 ppm), O<sub>2</sub> (10%), and He balance.

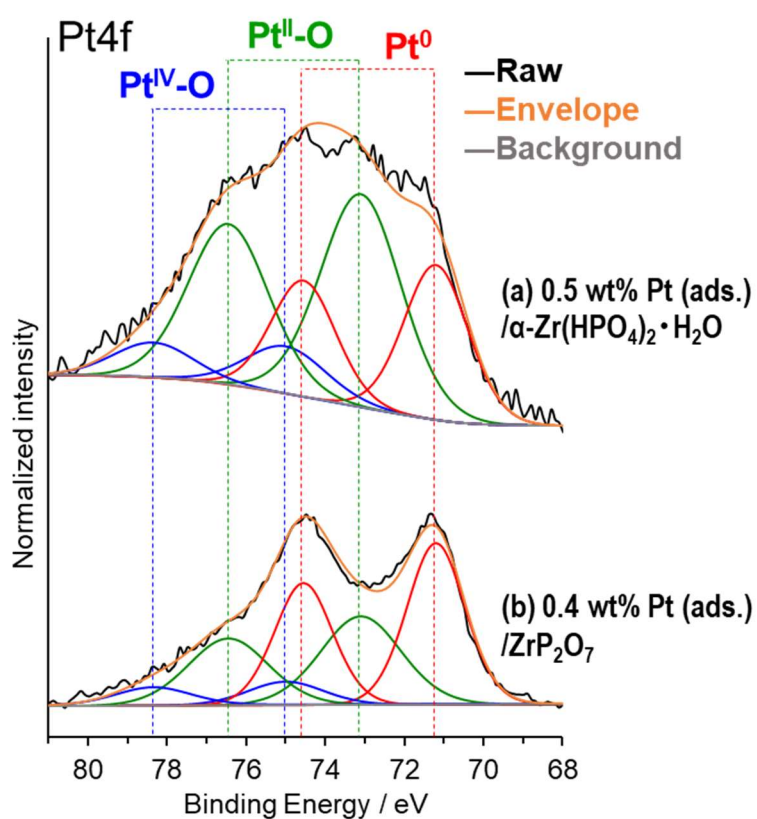

**Figure S20.** Pt 4f XPS spectra of 0.5 wt% Pt (ads.)/α-Zr(HPO<sub>4</sub>)<sub>2</sub>·H<sub>2</sub>O and 0.4 wt% Pt (ads.)/ZrP<sub>2</sub>O<sub>7</sub>. The intensity was normalized using the maximal intensity of Zr3d spectra.

**Table S1.** BET specific surface area ( $S_{\text{BET}}$ ) of the  $\alpha$ -ZrP ( $\alpha$ -Zr(HPO<sub>4</sub>)<sub>2</sub> · H<sub>2</sub>O) and its derivatives.

| Samples                                        | $S_{\text{BET}}$ / m <sup>2</sup> /g |
|------------------------------------------------|--------------------------------------|
| $\alpha$ -ZrP (as prepared)                    | 13.2                                 |
| Restacked ZrP nanosheet (0.1 M HCl)            | 26.1                                 |
| Freeze-dried ZrP nanosheet                     | 12.4                                 |
| HA-intercalated ZrP nanosheet (400 °C/1 h/air) | 40.0                                 |
| DA-intercalated ZrP nanosheet (400 °C/1 h/air) | 25.3                                 |

**Table S2.** Comparison of the maximal NO<sub>x</sub> conversion (conv.), N<sub>2</sub> selectivity, N<sub>2</sub>O yield (100 °C), and NO<sub>2</sub> yield (300 °C) over the Pt-based H<sub>2</sub>-SCR catalyst reported in previous literatures.

| Sample                                                                                                   | Feed gas composition;<br>Space velocity                                                                                      | Maximal<br>NO <sub>x</sub> conv. | N <sub>2</sub><br>selectivity | N <sub>2</sub> O yield<br>at 100 °C | NO <sub>2</sub> yield<br>at 300 °C | Ref.         |
|----------------------------------------------------------------------------------------------------------|------------------------------------------------------------------------------------------------------------------------------|----------------------------------|-------------------------------|-------------------------------------|------------------------------------|--------------|
| 1wt% Pt/Ti-MCM-41                                                                                        | NO/H <sub>2</sub> /O <sub>2</sub> = 0.1%/0.5%/6.7%, He balance;<br>80,000 h <sup>-1</sup>                                    | 88%<br>140 °C                    | 79%<br>140 °C                 | n/a                                 | n/a                                | [S1]         |
| 0.94wt% Pt/Al-MCM-41                                                                                     | NO/H <sub>2</sub> /O <sub>2</sub> = 0.1%/0.5%/6.7%, He balance;<br>80,000 h <sup>-1</sup>                                    | 80%<br>120 °C                    | 85%<br>120 °C                 | n/a                                 | n/a                                | [S2]         |
| 1wt% Pt/ZSM-35                                                                                           | NO/H <sub>2</sub> /O <sub>2</sub> = 0.1%/0.5%/6.7%, He balance;<br>80,000 h <sup>-1</sup>                                    | 81%<br>120 °C                    | 69%<br>120 °C                 | n/a                                 | n/a                                | [S3]         |
| 0.5wt% Pt/H-FER                                                                                          | NO/NO <sub>2</sub> /H <sub>2</sub> /O <sub>2</sub> = 0.091%/0.009%/0.5%/10%,<br>He balance; 36,000 h <sup>-1</sup>           | 87%<br>110 °C                    | 69%<br>110 °C                 | n/a                                 | 54%                                | [S4]         |
| 0.5wt% Pt/HY                                                                                             | NO/H <sub>2</sub> /O <sub>2</sub> = 0.1%/0.5%/10%, He balance;<br>32,000 h <sup>-1</sup>                                     | 81%<br>130 °C                    | 75%<br>130 °C                 | n/a                                 | n/a                                | [S5]         |
| 1wt% Pt/SSZ-13                                                                                           | NO/H <sub>2</sub> /H <sub>2</sub> O/O <sub>2</sub> = 0.1%/0.5%/5%/10%,<br>He balance; 20,000 h <sup>-1</sup>                 | 98%<br>100 °C                    | 23%<br>100 °C                 | 80%                                 | 60%                                | [S6]         |
| 1.5wt% Pt/ZSM-5                                                                                          | NO/H <sub>2</sub> /H <sub>2</sub> O/O <sub>2</sub> = 0.05%/0.5%/5%/5%,<br>He balance; 120,000 ml/h · g <sub>cat</sub>        | 99%<br>75 °C                     | 79%<br>75 °C                  | n/a                                 | 22%                                | [S7]         |
| 2wt% Pt/MnO <sub>x</sub>                                                                                 | NO/H <sub>2</sub> /O <sub>2</sub> = 0.048%/0.8%/5%, He balance;<br>78,000 h <sup>-1</sup>                                    | 63%<br>100 °C                    | 30%<br>100 °C                 | 34%                                 | n/a                                | [S8]         |
| 1wt% Pt/Ti <sub>0.5</sub> Zr <sub>0.5</sub><br>(TiO <sub>2</sub> +ZrO <sub>2</sub> +ZrTiO <sub>4</sub> ) | NO/H <sub>2</sub> /O <sub>2</sub> = 0.03%/0.24%/5%, N <sub>2</sub> balance;<br>36,000 h <sup>-1</sup>                        | 97%<br>130 °C                    | 60%<br>130 °C                 | n/a                                 | 13%<br>(250 °C)                    | [S9]         |
| 0.49wt% Pt (ads.)/ZrP<br>nanosheet                                                                       | NO/H <sub>2</sub> /O <sub>2</sub> = 0.02%/0.5%/10%, He balance;<br>120,000 ml/h · g <sub>cat</sub> , ~50,000 h <sup>-1</sup> | 89%<br>150 °C                    | 83%<br>150 °C                 | 16%                                 | 9%                                 | This<br>work |

**Table S3.** Percentages of Pt species of 0.08-0.49 wt% Pt (ads.)/ZrP nanosheet and 0.16 wt% Pt (imp.)/ZrP nanosheet (XPS analysis).

| Pt loading amount of Pt/ZrP nanosheet / wt% | Method | Pt <sup>0</sup> / % | Pt <sup>II</sup> -O / % | Pt <sup>IV</sup> -O / % |
|---------------------------------------------|--------|---------------------|-------------------------|-------------------------|
| 0.08                                        | Ads.   | 33.4                | 47.8                    | 18.8                    |
| 0.14                                        | Ads.   | 31.4                | 48.9                    | 19.7                    |
| 0.22                                        | Ads.   | 29.3                | 56.5                    | 14.2                    |
| 0.49                                        | Ads.   | 29.2                | 58.3                    | 12.5                    |
| 0.16                                        | Imp.   | 30.4                | 56.2                    | 13.4                    |

**Table S4.** Percentages of Pt species of 0.4 wt% Pt (ads.)/ZrP<sub>2</sub>O<sub>7</sub> and 0.5 wt% Pt (ads.)/ $\alpha$ -Zr(HPO<sub>4</sub>)<sub>2</sub>·H<sub>2</sub>O (XPS analysis).

| Samples                                                                    | Method | Pt <sup>0</sup> / % | Pt <sup>II</sup> -O / % | Pt <sup>IV</sup> -O / % |
|----------------------------------------------------------------------------|--------|---------------------|-------------------------|-------------------------|
| 0.4 wt% Pt/ZrP <sub>2</sub> O <sub>7</sub>                                 | Ads.   | 54.1                | 32.7                    | 13.2                    |
| 0.5 wt% Pt/ $\alpha$ -Zr(HPO <sub>4</sub> ) <sub>2</sub> ·H <sub>2</sub> O | Ads.   | 34.4                | 49.0                    | 16.6                    |

## References

- [S1] L. Li, P. Wu, Q. Yu, G. Wu, N. Guan, *Appl. Catal. B*, 2010, *94*, 254-262.
- [S2] P. Wu, L. Li, Q. Yu, G. Wu, N. Guan, *Catal. Today*, 2010, *158*, 228-234.
- [S3] Q. Yu, M. Richter, F. Kong, L. Li, G. Wu, N. Guan, *Catal. Today*, 2010, *158*, 452-458.
- [S4] S. Yang, X. Wang, W. Chu, Z. Song, S. Zhao, *Appl. Catal. B*, 2011, *107*, 380-385.
- [S5] X. Zhang, X. Wang, X. Zhao, Y. Xu, H. Gao, F. Zhang, *Chem. Eng. J.*, 2014, *252*, 288-297.
- [S6] J. Shao, P. H. Ho, D. Creaser, L. Olsson, *Appl. Catal. O*, 2024, *188*, 206947.
- [S7] D. C. Park, S. Moon, J. H. Song, H. Kim, E. Lee, Y. H. Lim, D. H. Kim, *Catal. Today*, 2024, *425*, 114318.
- [S8] S. M. Park, M. -Y. Kim, E. S. Kim, H. -S. Han, G. Seo, *Appl. Catal. A*, 2011, *395*, 120-128.
- [S9] Y. Li, D. He, H. Zhao, M. Pei, Y. Fan, H. Xu, J. Wang, Y. Chen, *Chem. Eng. J.*, 2024, *490*, 151714.
